# Supplementary material
Source: MDPI journal article supplement (https://www.mdpi.com/2073-4344/13/10/1378)
Supplement: s1 [file s1]

## Supporting Information

### Noble metal single-atom coordinated to nitrogen, oxygen, and carbon as electrocatalysts for oxygen evolution

**Table S1.** Gibbs free energy change ( $\Delta G$ ) for each OER reaction step on  $MN_4-C$ ,  $MO_4-C$  and  $MC_4-C$  ( $M = Ir, Ru$ ) in vacuum.

|                  |                               | $\Delta G$ (eV) |           |           |           |           |           |
|------------------|-------------------------------|-----------------|-----------|-----------|-----------|-----------|-----------|
| step             | Process                       | $IrN_4-C$       | $IrO_4-C$ | $IrC_4-C$ | $RuN_4-C$ | $RuO_4-C$ | $RuC_4-C$ |
| 1                | $H_2O(l) \rightarrow OH^*$    | 0.96            | 1.72      | −0.42     | −0.01     | 0.40      | −0.26     |
| 2                | $OH^* \rightarrow O^*$        | 1.53            | 1.22      | 0.42      | 0.68      | 1.12      | 0.18      |
| 3                | $O^* \rightarrow OOH^*$       | 1.48            | 1.74      | 2.66      | 2.22      | 1.85      | 2.96      |
| 4                | $OOH^* \rightarrow O_2(g)$    | 0.95            | 0.25      | 2.26      | 2.03      | 1.55      | 2.04      |
| Total $\Delta G$ | $2H_2O(l) \rightarrow O_2(g)$ | 4.92            | 4.92      | 4.92      | 4.92      | 4.92      | 4.92      |

**Table S2.** The  $d$ -band center of  $M$  atom on  $MN_4-C$ ,  $MO_4-C$  and  $MC_4-C$  ( $M = Ir, Ru$ ).

| Systems   | $d$ -band center (eV) | Systems   | $d$ -band center (eV) |
|-----------|-----------------------|-----------|-----------------------|
| $IrN_4-C$ | −1.86                 | $RuN_4-C$ | −1.07                 |
| $IrO_4-C$ | −2.02                 | $RuO_4-C$ | −1.10                 |
| $IrC_4-C$ | −2.60                 | $RuC_4-C$ | −1.81                 |

**Table S3.** Bader charges of IrN<sub>4</sub>, IrO<sub>4</sub>-C, IrC<sub>4</sub>-C. The ZVAL represents the number of valent electrons in each atomic sphere.

| Systems                                                                                                   | Atom           | Calculated<br>valence electrons | ZVAL | Net charge ( e ) |
|-----------------------------------------------------------------------------------------------------------|----------------|---------------------------------|------|------------------|
| 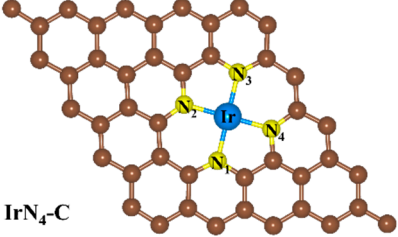<br>IrN <sub>4</sub> -C  | N <sub>1</sub> | 6.21                            | 5.00 | −1.21            |
|                                                                                                           | N <sub>2</sub> | 6.14                            |      | −1.14            |
|                                                                                                           | N <sub>3</sub> | 6.21                            |      | −1.21            |
|                                                                                                           | N <sub>4</sub> | 6.16                            |      | −1.16            |
|                                                                                                           | Ir             | 8.28                            | 9.00 | 0.72             |
| <br>IrO <sub>4</sub> -C  | O <sub>1</sub> | 7.10                            | 6.00 | −1.10            |
|                                                                                                           | O <sub>2</sub> | 7.10                            |      | −1.10            |
|                                                                                                           | O <sub>3</sub> | 7.09                            |      | −1.09            |
|                                                                                                           | O <sub>4</sub> | 7.09                            |      | −1.09            |
|                                                                                                           | Ir             | 8.39                            | 9.00 | 0.61             |
| <br>IrC <sub>4</sub> -C | C <sub>1</sub> | 4.17                            | 4.00 | −0.17            |
|                                                                                                           | C <sub>2</sub> | 4.17                            |      | −0.17            |
|                                                                                                           | C <sub>3</sub> | 4.16                            |      | −0.16            |
|                                                                                                           | C <sub>4</sub> | 4.17                            |      | −0.17            |
|                                                                                                           | Ir             | 8.44                            | 9.00 | 0.56             |

**Table S4.** Bader charges of RuN<sub>4</sub>, RuO<sub>4</sub>-C, RuC<sub>4</sub>-C. The ZVAL represents the number of valent electrons in each atomic sphere.

| Systems                                                                                                   | Atom           | Calculated<br>valence electrons | ZVAL | Net charge ( e ) |
|-----------------------------------------------------------------------------------------------------------|----------------|---------------------------------|------|------------------|
| 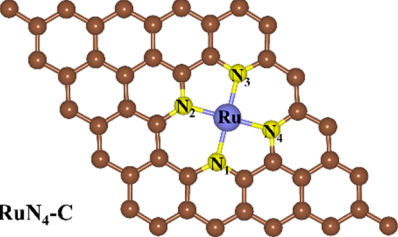<br>RuN <sub>4</sub> -C  | N <sub>1</sub> | 6.21                            | 5.00 | −1.21            |
|                                                                                                           | N <sub>2</sub> | 6.07                            |      | −1.07            |
|                                                                                                           | N <sub>3</sub> | 6.18                            |      | −1.18            |
|                                                                                                           | N <sub>4</sub> | 6.17                            |      | −1.17            |
|                                                                                                           | Ru             | 7.18                            | 8.00 | 0.82             |
| <br>RuO <sub>4</sub> -C  | O <sub>1</sub> | 7.11                            | 6.00 | −1.11            |
|                                                                                                           | O <sub>2</sub> | 7.11                            |      | −1.11            |
|                                                                                                           | O <sub>3</sub> | 7.11                            |      | −1.11            |
|                                                                                                           | O <sub>4</sub> | 7.11                            |      | −1.11            |
|                                                                                                           | Ru             | 7.46                            | 8.00 | 0.54             |
| <br>RuC <sub>4</sub> -C | C <sub>1</sub> | 4.12                            | 4.00 | −0.12            |
|                                                                                                           | C <sub>2</sub> | 4.09                            |      | −0.09            |
|                                                                                                           | C <sub>3</sub> | 4.13                            |      | −0.13            |
|                                                                                                           | C <sub>4</sub> | 4.09                            |      | −0.09            |
|                                                                                                           | Ru             | 7.35                            | 8.00 | 0.65             |

**Table S5.** Gibbs free energy change ( $\Delta G$ ) for each OER reaction step on  $\text{MN}_4\text{-C}$ ,  $\text{MO}_4\text{-C}$  and  $\text{MC}_4\text{-C}$  ( $\text{M} = \text{Ir, Ru}$ ) with an implicit solvent model.

| step             | Process                                                          | $\Delta G$ (eV)         |                         |                         |                         |                         |                         |
|------------------|------------------------------------------------------------------|-------------------------|-------------------------|-------------------------|-------------------------|-------------------------|-------------------------|
|                  |                                                                  | $\text{IrN}_4\text{-C}$ | $\text{IrO}_4\text{-C}$ | $\text{IrC}_4\text{-C}$ | $\text{RuN}_4\text{-C}$ | $\text{RuO}_4\text{-C}$ | $\text{RuC}_4\text{-C}$ |
| 1                | $\text{H}_2\text{O}(\text{l}) \rightarrow \text{OH}^*$           | 0.84                    | 1.55                    | −0.54                   | −0.16                   | 0.14                    | −0.31                   |
| 2                | $\text{OH}^* \rightarrow \text{O}^*$                             | 1.39                    | 0.93                    | 0.46                    | 0.72                    | 1.01                    | 0.29                    |
| 3                | $\text{O}^* \rightarrow \text{OOH}^*$                            | 1.56                    | 1.94                    | 2.57                    | 2.16                    | 1.90                    | 2.81                    |
| 4                | $\text{OOH}^* \rightarrow \text{O}_2(\text{g})$                  | 1.13                    | 0.50                    | 2.42                    | 2.21                    | 1.87                    | 2.13                    |
| Total $\Delta G$ | $2\text{H}_2\text{O}(\text{l}) \rightarrow \text{O}_2(\text{g})$ | 4.92                    | 4.92                    | 4.92                    | 4.92                    | 4.92                    | 4.92                    |

**Table S6.** The calculated total energies ( $E$ ) and thermodynamic quantities for the gas phase  $\text{H}_2$  species ( $T = 298.15\text{ K}$ ,  $P = 1\text{ bar}$ ), and free  $\text{H}_2\text{O}$  at the  $298.15\text{ K}$ ,  $0.035\text{ bar}$ .

| Species                        | $E$ (eV) | $\text{ZPE-TS}$ (eV) | $G$ (eV) |
|--------------------------------|----------|----------------------|----------|
| $\text{H}_2(\text{g})$         | −6.76    | −0.05                | −6.80    |
| $\text{H}_2\text{O}(\text{l})$ | −14.22   | −0.00                | −14.22   |

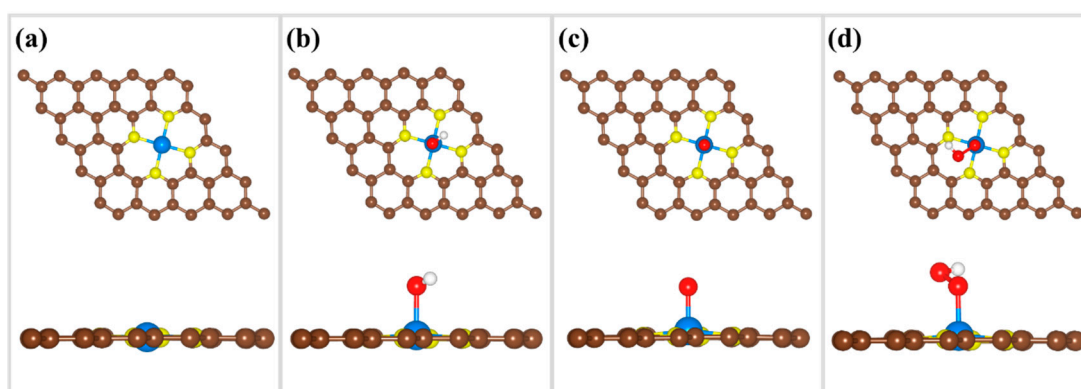**Figure S1.** Optimized structures of (a)  $\text{IrN}_4\text{-C}$  catalyst and (b–d) OER intermediates along the pathway on  $\text{IrN}_4\text{-C}$ . Ir, C, N, H and O atoms are presented with blue, brown, yellow, white and red circles, respectively.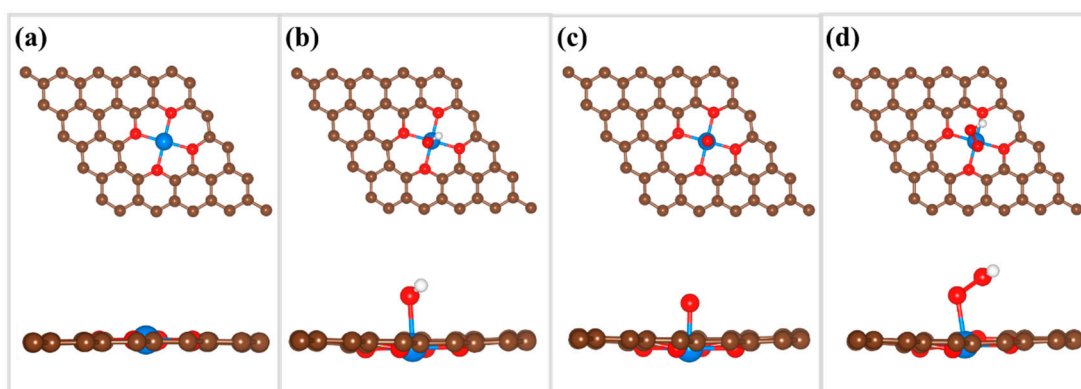**Figure S2.** Optimized structure of (a)  $\text{IrO}_4\text{-C}$  catalyst and (b–d) OER intermediates along the pathway on  $\text{IrO}_4\text{-C}$ . Ir, C, H and O atoms are presented with blue, brown, white and red circles, respectively.

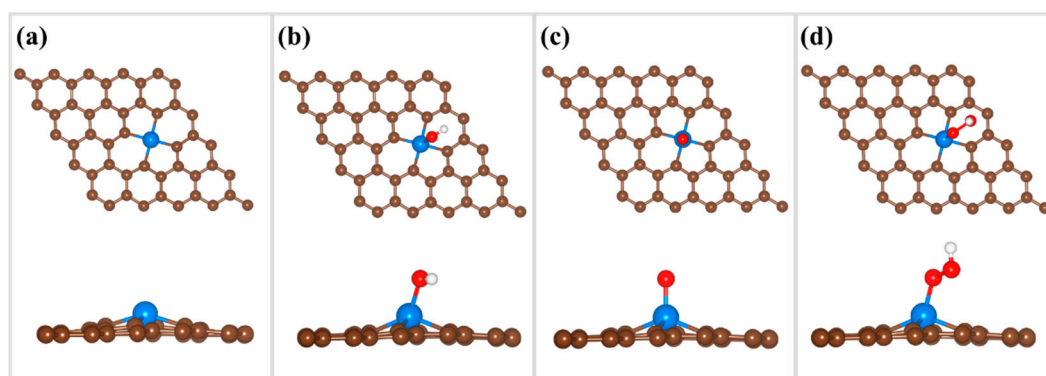

**Figure S3.** Optimized structure of (a) Ir<sub>4</sub>-C catalyst and (b-d) OER intermediates along the pathway on Ir<sub>4</sub>-C. Ir, C, H and O atoms are presented with blue, brown, white and red circles, respectively.

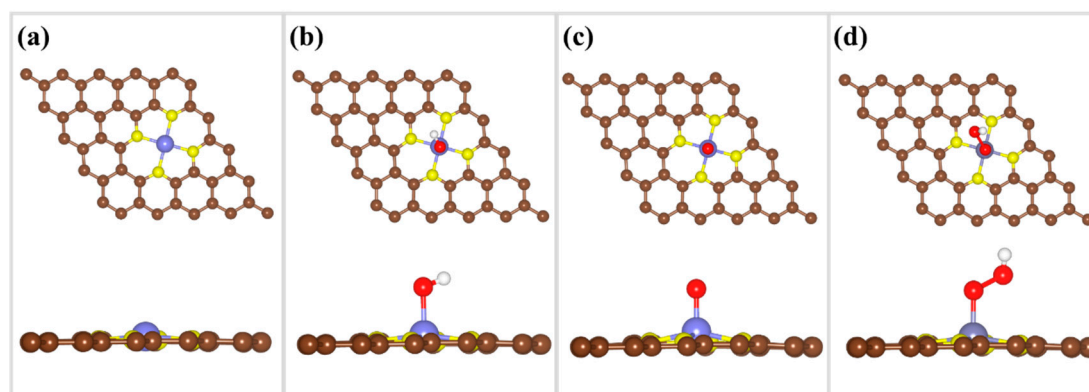

**Figure S4.** Optimized structure of (a) RuN<sub>4</sub>-C catalyst and (b-d) OER intermediates along the pathway on RuN<sub>4</sub>-C. Ru, C, N, H and O atoms are presented with purple, brown, yellow, white and red circles, respectively.

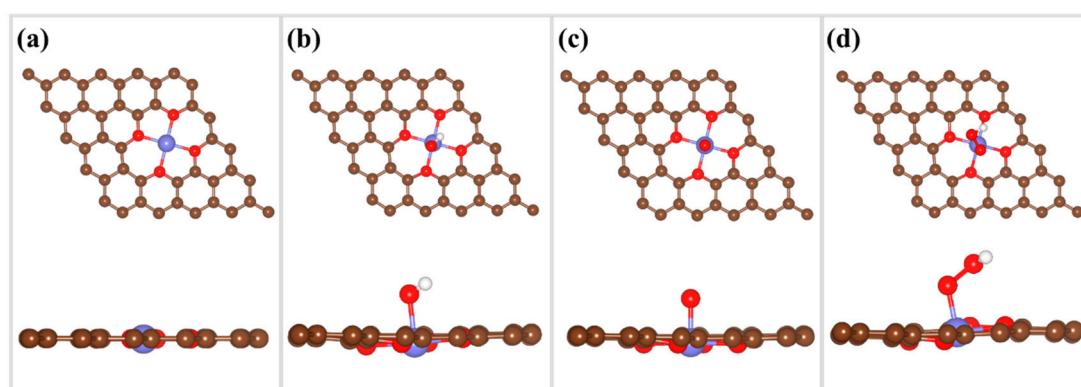

**Figure S5.** Optimized structure of (a) RuO<sub>4</sub>-C catalyst and (b-d) OER intermediates along the pathway on RuO<sub>4</sub>-C. Ru, C, H and O atoms are presented with purple, brown, white and red circles, respectively.

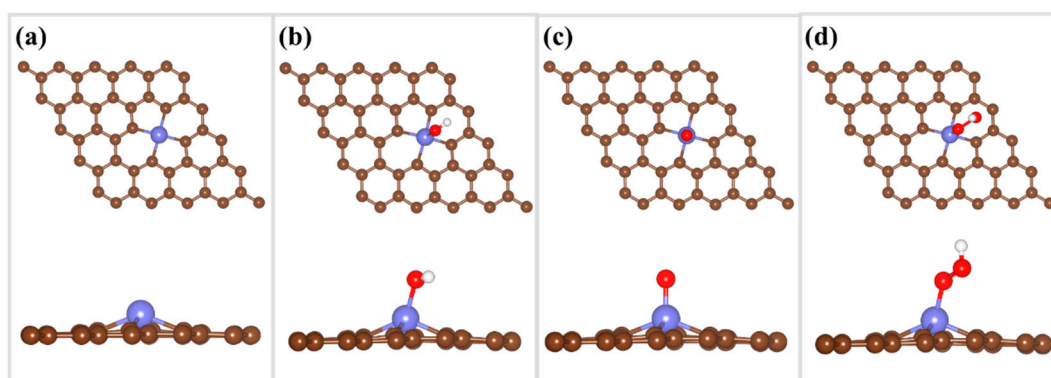

**Figure S6.** Optimized structure of (a)  $\text{RuC}_4\text{-C}$  catalyst and (b-d) OER intermediates along the pathway on  $\text{RuC}_4\text{-C}$ . Ru, C, H and O atoms are presented with purple, brown, white and red circles, respectively.

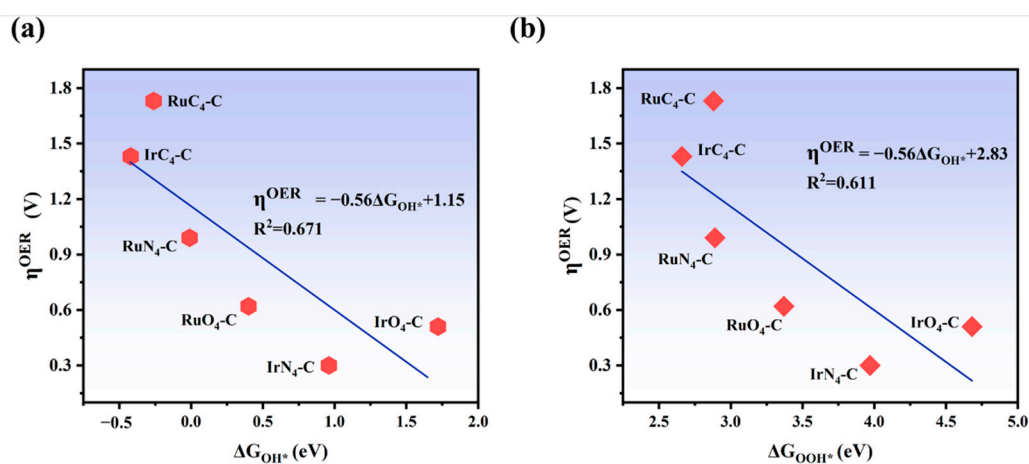

**Figure S7.** The scaling relationship between (a)  $\Delta G_{\text{OH}^*}$  vs.  $\eta^{\text{OER}}$ , (b)  $\Delta G_{\text{OOH}^*}$  vs.  $\eta^{\text{OER}}$  on  $\text{MN}_4\text{-C}$ ,  $\text{MO}_4\text{-C}$  and  $\text{MC}_4\text{-C}$  ( $\text{M} = \text{Ir}, \text{Ru}$ ).

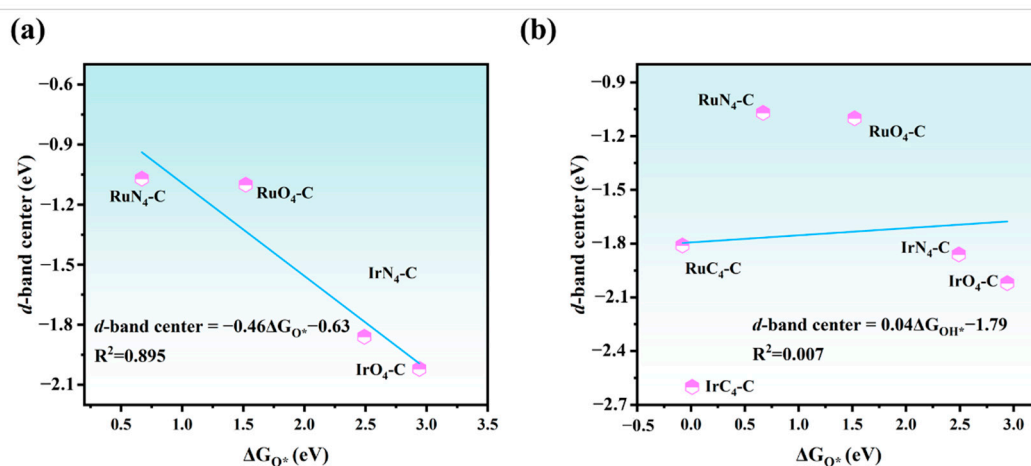

**Figure S8.** The scaling relationship between  $\Delta G_{O^*}$  vs.  $d$ -band center on  $MN_4$ -C,  $MO_4$ -C and  $MC_4$ -C ( $M = Ir, Ru$ ).

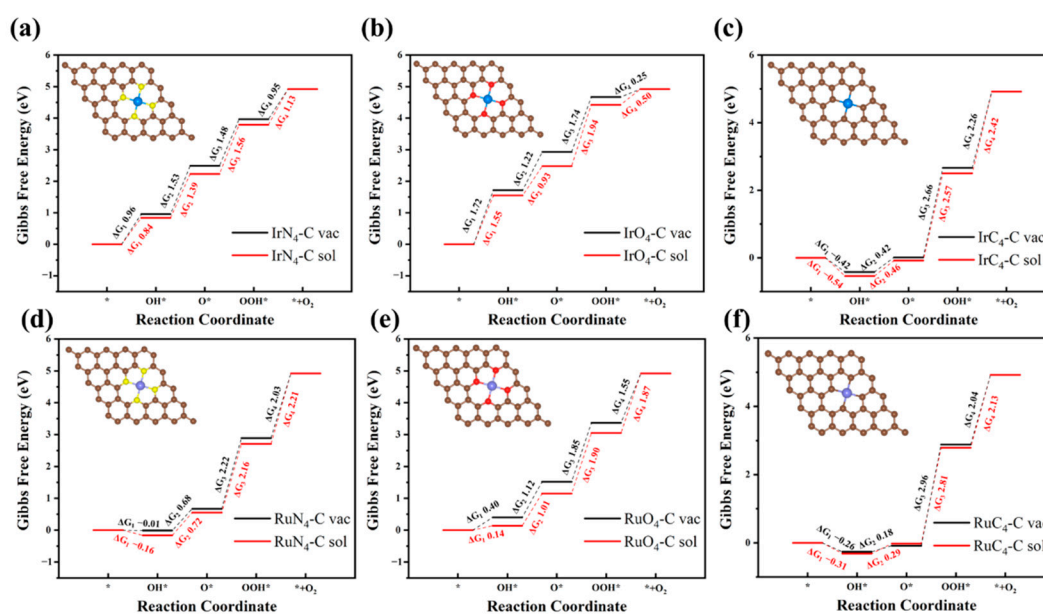

**Figure S9.** Free energy diagrams of OER processes on (a)  $IrN_4$ -C, (b)  $IrO_4$ -C, (c)  $IrC_4$ -C, (d)  $RuN_4$ -C, (e)  $RuO_4$ -C and (f)  $RuC_4$ -C in vacuum (black lines) and implicit solvent model (red lines), respectively. H, C, O, N, Ir and Ru atoms are represented with white, brown, red, yellow, blue and purple circles.
